# Supplementary material for: Distant Phe345 mutation compromises the stability and activity of Mycobacterium tuberculosis isocitrate lyase by modulating its structural flexibility
Source: PubMed Central journal article supplement (PMC5430663; doi:10.1038/s41598-017-01235-z), 2017-04-21
Supplement: 41598_2017_1235_MOESM1_ESM.pdf [file 41598_2017_1235_MOESM1_ESM.pdf]

## Supplementary Material

### **Distant Phe345 mutation compromises the stability and activity of *Mycobacterium tuberculosis* isocitrate lyase (MtbICL) by modulating its structural flexibility**

Harish Shukla<sup>#</sup>, Rohit Shukla<sup>#</sup>, Amit Sonkar<sup>#</sup>, Tripti Pandey, and Timir Tripathi

Molecular and Structural Biophysics Laboratory, Department of Biochemistry, North-Eastern Hill University, Shillong 793022, India

*Running title: Conformational dynamics of inactive MtbICL<sub>F345A</sub> mutant*

To whom correspondence should be addressed: Dr. TimirTripathi, Department of Biochemistry, North-Eastern Hill University, Shillong- 793022, India. Email: timir.tripathi@gmail.com, ttripathi@nehu.ac.in; Tel: +91-364-2722141; Fax: +91-364-2550108.

<sup>#</sup>These authors contributed equally to the work.

**Supplementary Fig. S1. SDS-PAGE showing the purified native and mutant MtbICL.** Lanes 1-3 represents molecular weight markers, native and mutant MtbICL respectively.

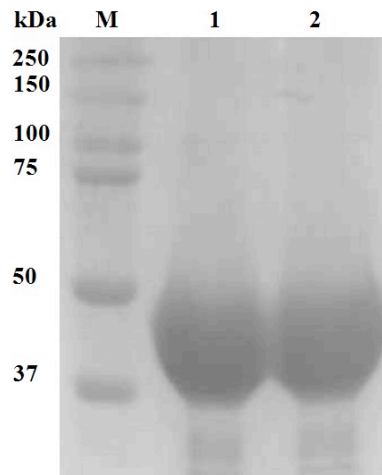

**Supplementary Fig. S2.** The time evolution of secondary structural elements changes in the chain A of native MtbICL.

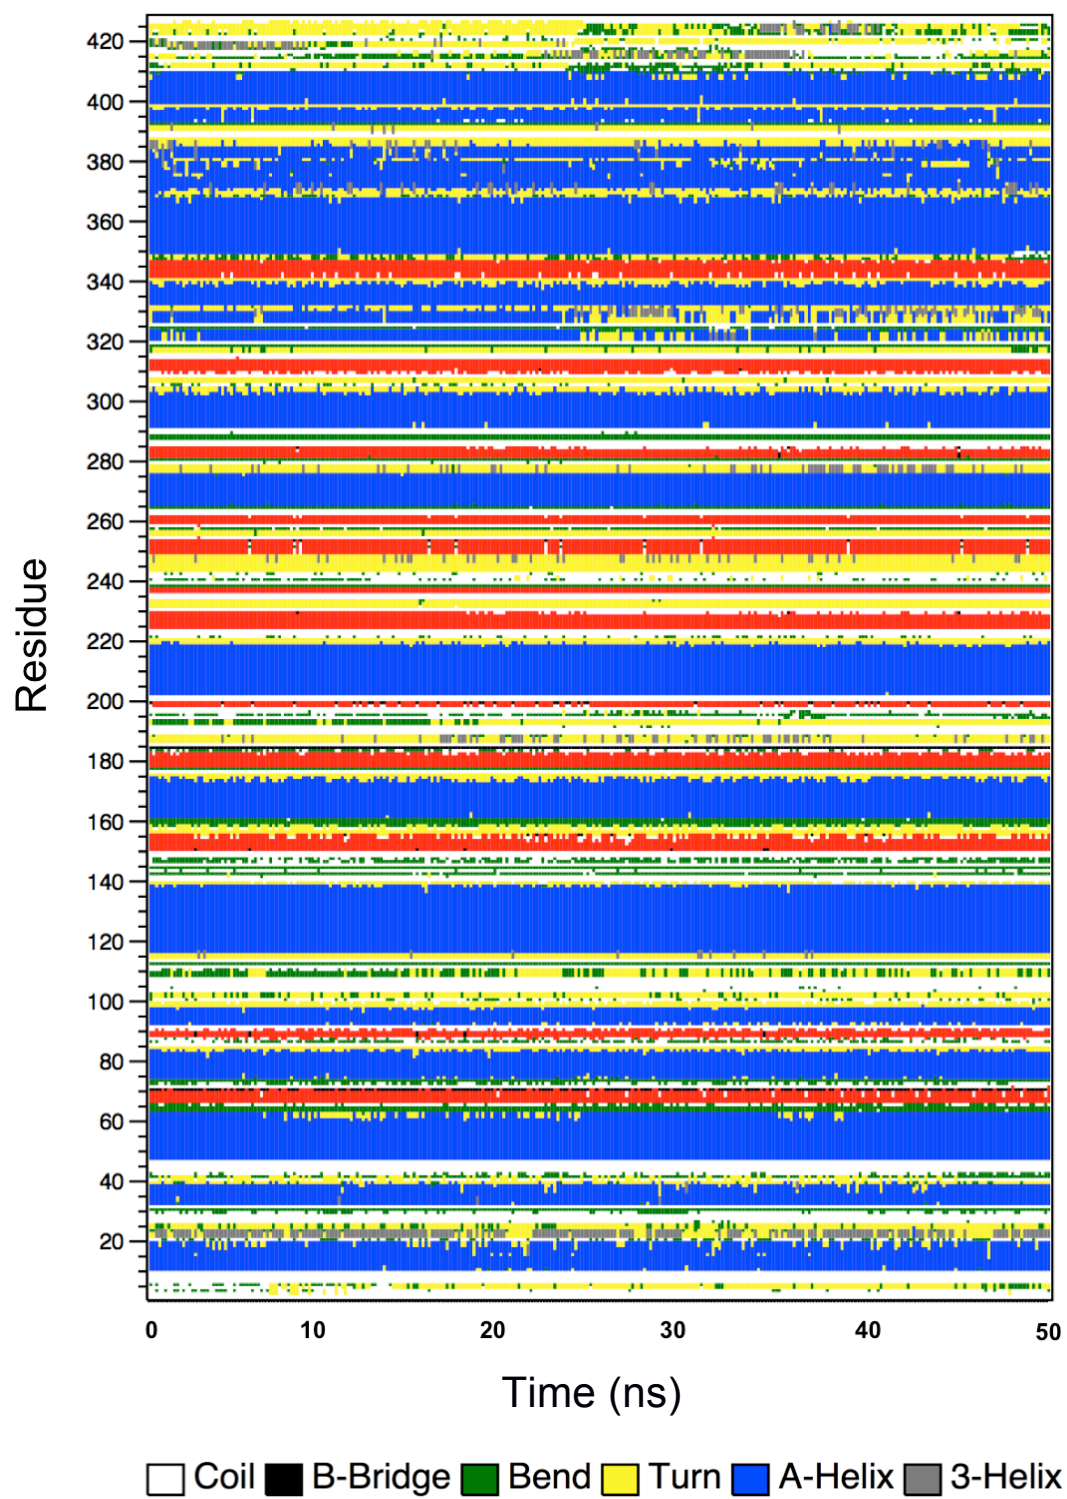

**Supplementary Fig. S3.** The time evolution of secondary structural elements changes in the chain A of mutant MtbICL.

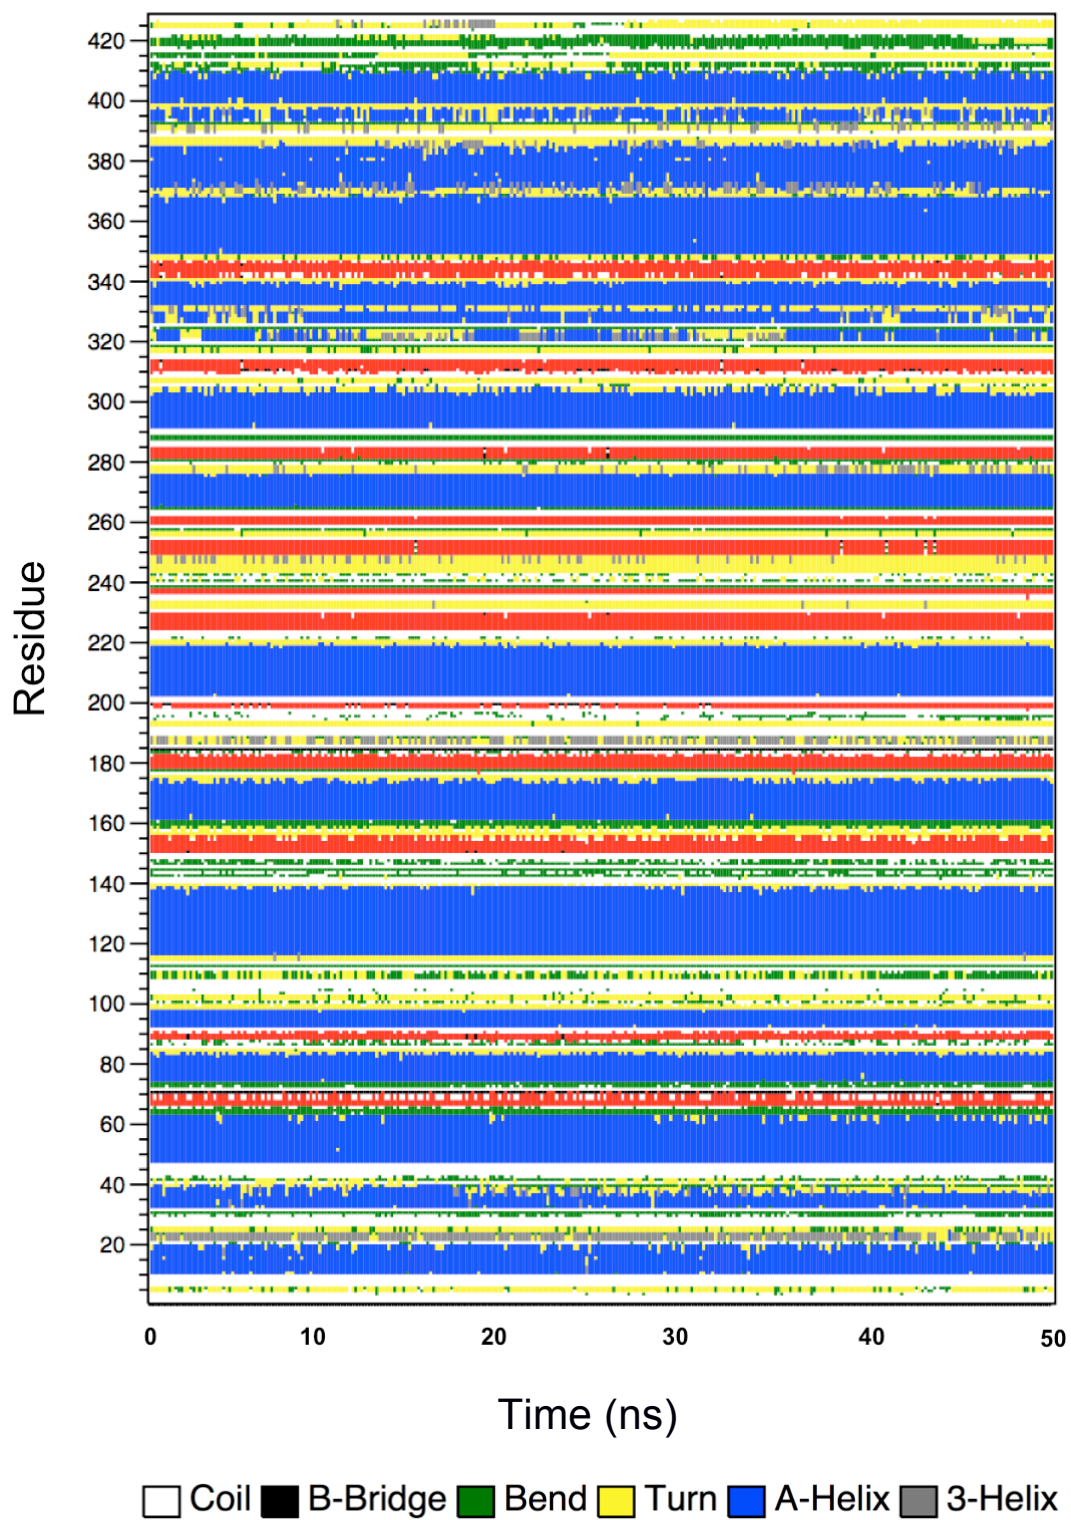

**Supplementary Fig. S4.** Projection of the motion of the protein in phase space along the first two principal eigenvectors for native and mutant MtbICL.

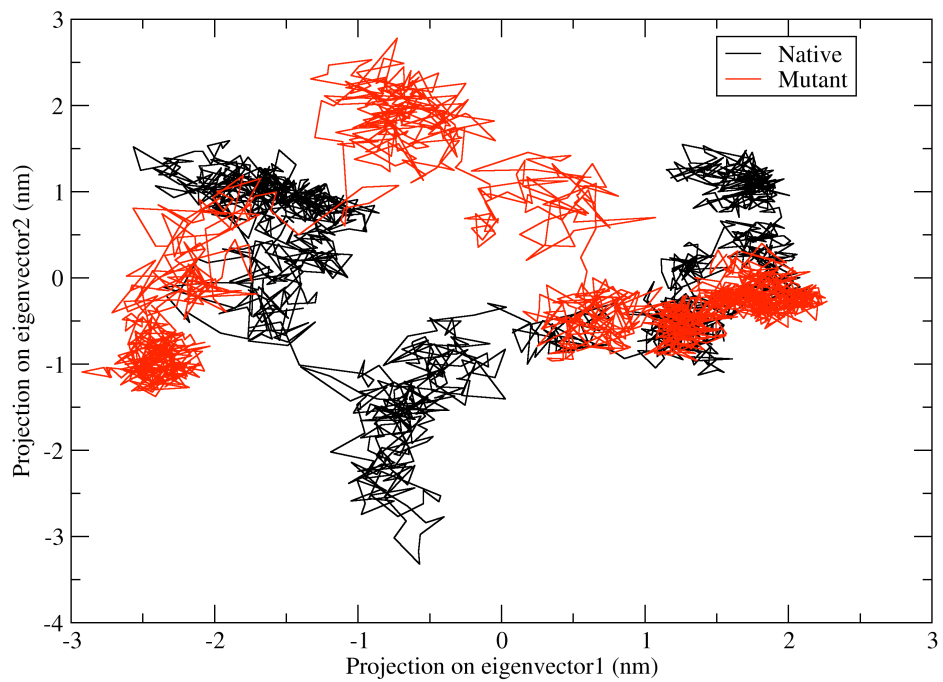

**Supplementary Table S1.** Time dependent average secondary structure element changes for tetrameric native and mutant MtbICL.

| <b>Name</b>   | <b>Structure</b>  | <b>Coil</b>       | <b><math>\beta</math>-Sheet</b> | <b><math>\beta</math>-Bridge</b> | <b>Bend</b>      | <b>Turn</b>      | <b><math>\alpha</math>-Helix</b> | <b>5-Helix</b>   | <b>3-Helix</b> |
|---------------|-------------------|-------------------|---------------------------------|----------------------------------|------------------|------------------|----------------------------------|------------------|----------------|
| <b>Native</b> | 355481<br>(0.69%) | 103522<br>(0.20%) | 56821<br>(0.11%)                | 2688<br>(0.01%)                  | 44343<br>(0.09%) | 77105<br>(0.15%) | 218867<br>(0.42%)                | 10762<br>(0.02%) | 903<br>(0.00%) |
| <b>Mutant</b> | 353129<br>(0.69%) | 103015<br>(0.20%) | 57737<br>(0.11%)                | 2466<br>(0.00%)                  | 45796<br>(0.09%) | 74933<br>(0.15%) | 217993<br>(0.42%)                | 12168<br>(0.02%) | 903<br>(0.00%) |

**Supplementary Table S2.** Time dependent average secondary structure element changes for chain A of native and mutant MtbICL.

| <b>Name</b>   | <b>Structure</b> | <b>Coil</b>      | <b><math>\beta</math>-Sheet</b> | <b><math>\beta</math>-Bridge</b> | <b>Bend</b>      | <b>Turn</b>      | <b><math>\alpha</math>-Helix</b> | <b>5-Helix</b> | <b>3-Helix</b>  |
|---------------|------------------|------------------|---------------------------------|----------------------------------|------------------|------------------|----------------------------------|----------------|-----------------|
| <b>Native</b> | 90163<br>(0.70%) | 25876<br>(0.20%) | 14324<br>(0.11%)                | 626<br>(0.00%)                   | 10417<br>(0.08%) | 20120<br>(0.16%) | 55093<br>(0.43%)                 | -              | 2071<br>(0.02%) |
| <b>Mutant</b> | 88308<br>(0.69%) | 25727<br>(0.20%) | 13946<br>(0.11%)                | 683<br>(0.00%)                   | 11642<br>(0.09%) | 18779<br>(0.15%) | 54900<br>(0.42%)                 | -              | 2850<br>(0.02%) |

**Supplementary Table S3.** Time dependent average secondary structure element changes in the active site region (170-210 amino residues) of native and mutant MtbICL.

| <b>Name</b>   | <b>Structure</b> | <b>Coil</b>     | <b><math>\beta</math>-Sheet</b> | <b><math>\beta</math>-Bridge</b> | <b>Bend</b>    | <b>Turn</b>     | <b><math>\alpha</math>-Helix</b> | <b>5-Helix</b> | <b>3-Helix</b> |
|---------------|------------------|-----------------|---------------------------------|----------------------------------|----------------|-----------------|----------------------------------|----------------|----------------|
| <b>Native</b> | 5314<br>(0.43%)  | 5661<br>(0.46%) | na                              | 601<br>(0.05%)                   | 937<br>(0.08%) | 1829<br>(0.15%) | 2883<br>(0.23%)                  | na             | 429<br>(0.03%) |
| <b>Mutant</b> | 5124<br>(0.42%)  | 5812<br>(0.47%) | na                              | 602<br>(0.05%)                   | 655<br>(0.05%) | 1567<br>(0.13%) | 2955<br>(0.24%)                  | na             | 750<br>(0.06%) |



**Supplementary Table S4.** Time dependent average secondary structure element changes in C-terminal region (400-427 amino residues) of native and mutant MtbICL.

| <b>Name</b>   | <b>Structure</b> | <b>Coil</b>     | <b><math>\beta</math>-Sheet</b> | <b><math>\beta</math>-Bridge</b> | <b>Bend</b>     | <b>Turn</b>     | <b><math>\alpha</math>-Helix</b> | <b>5-Helix</b> | <b>3-Helix</b> |
|---------------|------------------|-----------------|---------------------------------|----------------------------------|-----------------|-----------------|----------------------------------|----------------|----------------|
| <b>Native</b> | 4539<br>(0.54%)  | 2579<br>(0.31%) | na                              | na                               | 953<br>(0.11%)  | 2001<br>(0.24%) | 2538<br>(0.30%)                  | na             | 357<br>(0.04%) |
| <b>Mutant</b> | 3887<br>(0.46%)  | 2577<br>(0.31%) | na                              | na                               | 1904<br>(0.23%) | 1413<br>(0.17%) | 2474<br>(0.29%)                  | na             | 60<br>(0.01%)  |
